# Supplementary material for: A Neutral Heteroleptic Molybdenum Cluster trans-[{Mo6I8}(py)2I4]
Source: MDPI journal article supplement (doi:10.3390/sym14102117), 2022-10-12
Supplement: s1 [file s1]

## Supporting Information

# A neutral heteroleptic molybdenum cluster *trans*- [Mo<sub>6</sub>I<sub>8</sub>](py)<sub>2</sub>I<sub>4</sub>]

Margarita V. Marchuk <sup>1</sup>, Yuri A. Vorotnikov <sup>1</sup>, Anton A. Ivanov <sup>1</sup>, Ilia V. Eltsov <sup>2</sup>, Natalia V. Kuratieva <sup>1</sup>, Michael A. Shestopalov <sup>1,\*</sup>

<sup>1</sup> Nikolaev Institute of Inorganic Chemistry of Siberian Branch of Russian Academy of Sciences,

3 Acad. Lavrentiev ave., 630090 Novosibirsk, Russia; marchuk@niic.nsc.ru (M.V.M.), vorotnikov@niic.nsc.ru (Y.A.V.), ivanov338@niic.nsc.ru (A.A.I.), kuratieva@gmail.com (N.V.K.), shtopy@niic.nsc.ru (M.A.S.)

<sup>2</sup> Department of Natural Sciences, Novosibirsk State University, 1 Pirogova st., 630090 Novosibirsk, Russia; eiv@fen.nsu.ru

\* Correspondence: shtopy@niic.nsc.ru

**Table S1.** Selected crystallographic parameters of the single-crystal X-ray diffraction structural analysis for (pyH)<sub>0.2</sub>[{Mo<sub>6</sub>I<sub>8</sub>}(py)<sub>1.8</sub>I<sub>4.2</sub>}]·1.8py

| Compound                                                                             | (pyH) <sub>0.2</sub> [{Mo <sub>6</sub> I <sub>8</sub> }(py) <sub>1.8</sub> I <sub>4.2</sub> }]·1.8py |
|--------------------------------------------------------------------------------------|------------------------------------------------------------------------------------------------------|
| Empirical formula                                                                    | C <sub>19</sub> H <sub>19.2</sub> I <sub>12.2</sub> Mo <sub>6</sub> N <sub>3.8</sub>                 |
| Formula weight                                                                       | 2424.60                                                                                              |
| Temperature, K                                                                       | 150(2)                                                                                               |
| Crystal system                                                                       | monoclinic                                                                                           |
| Space group                                                                          | <i>P</i> 2 <sub>1</sub> /c                                                                           |
| <i>a</i> , Å                                                                         | 12.276(3)                                                                                            |
| <i>b</i> , Å                                                                         | 14.563(3)                                                                                            |
| <i>c</i> , Å                                                                         | 12.586(3)                                                                                            |
| $\beta$ , °                                                                          | 104.640(6)                                                                                           |
| <i>V</i> , Å <sup>3</sup>                                                            | 2177.0(8)                                                                                            |
| <i>Z</i>                                                                             | 2                                                                                                    |
| $\rho_{\text{calc}}$ , g/cm <sup>3</sup>                                             | 3.699                                                                                                |
| $\mu$ , mm <sup>-1</sup>                                                             | 10.345                                                                                               |
| <i>F</i> (000)                                                                       | 2117                                                                                                 |
| Crystal size                                                                         | 0.12 × 0.08 × 0.02                                                                                   |
| 2 $\Theta$ range for data collection, °                                              | 2.180 – 26.372                                                                                       |
|                                                                                      | –15 ≤ <i>h</i> ≤ 14                                                                                  |
| Index ranges                                                                         | –18 ≤ <i>k</i> ≤ 16                                                                                  |
|                                                                                      | –15 ≤ <i>l</i> ≤ 13                                                                                  |
| Reflections collected                                                                | 12938                                                                                                |
| Independent reflections; [ <i>R</i> <sub>int</sub> ]                                 | 4445; [0.0800]                                                                                       |
| Parameters refined                                                                   | 193                                                                                                  |
| Goodness-of-fit on <i>F</i> <sup>2</sup>                                             | 0.935                                                                                                |
| <i>R</i> <sub>1</sub> / <i>wR</i> <sub>2</sub> ( <i>I</i> > 2 $\sigma$ ( <i>I</i> )) | 0.0574 / 0.1139                                                                                      |
| <i>R</i> <sub>1</sub> / <i>wR</i> <sub>1</sub> (all data)                            | 0.1238 / 0.1298                                                                                      |
| $\Delta\rho_{\text{max}}/\Delta\rho_{\text{min}}$ (e·Å <sup>-3</sup> )               | 2.360 / –1.464                                                                                       |

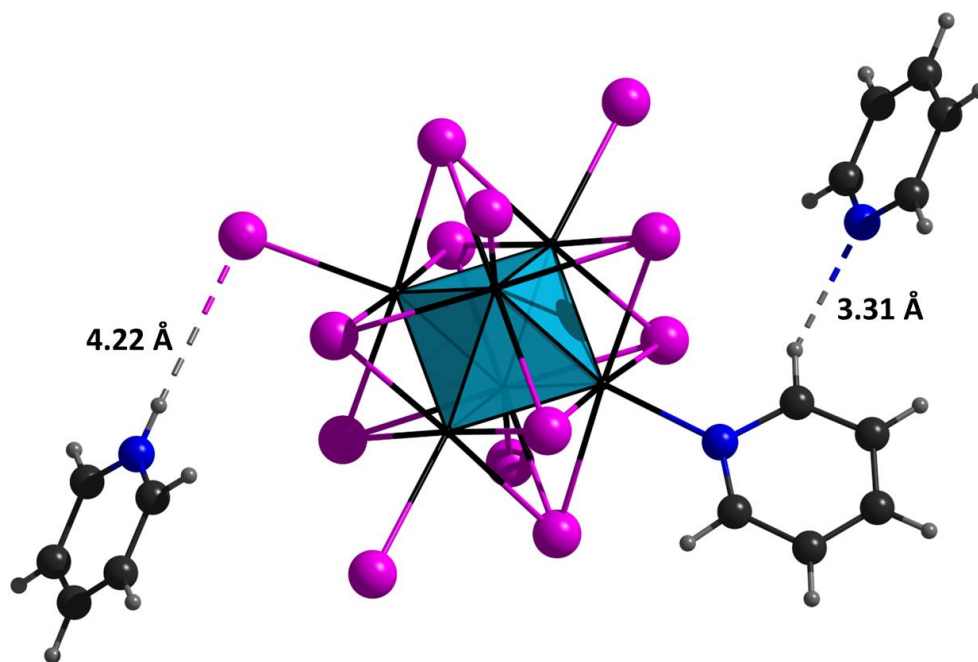

**Figure S1.** Illustration of  $\text{py}^{\text{solv}} \cdots \text{py}^{\text{coord}}$  and  $\text{pyH} \cdots \text{I}^{\text{a}}$  interactions. Color code: light blue octahedron – Mo<sub>6</sub>, purple – iodine, blue – nitrogen, black – carbon, gray – hydrogen.

**Table S2.** Crystal lattice parameters for (pyH)<sub>0.2</sub>[[Mo<sub>6</sub>I<sub>8</sub>](py)<sub>1.8</sub>I<sub>4.2</sub>]<sub>2</sub>·1.8py and [[Mo<sub>6</sub>X<sub>8</sub>](py)<sub>2</sub>X<sub>4</sub>] (X = Cl, Br)

| Compound                                                                                                          | Crystal system | <i>a</i> , Å | <i>b</i> , Å | <i>c</i> , Å | β, °       |
|-------------------------------------------------------------------------------------------------------------------|----------------|--------------|--------------|--------------|------------|
| (pyH) <sub>0.2</sub> [[Mo <sub>6</sub> I <sub>8</sub> ](py) <sub>1.8</sub> I <sub>4.2</sub> ] <sub>2</sub> ·1.8py | monoclinic     | 12.276(3)    | 14.563(3)    | 12.586(3)    | 104.640(6) |
| [[Mo <sub>6</sub> Cl <sub>8</sub> ](py) <sub>2</sub> Cl <sub>4</sub> ]                                            | orthorhombic   | 17.412(1)    | 20.376(2)    | 12.074(1)    | 90         |
| [[Mo <sub>6</sub> Cl <sub>8</sub> ](py) <sub>2</sub> Br <sub>4</sub> ]                                            |                | 17.780(2)    | 20.691(2)    | 12.282(1)    |            |
| [[Mo <sub>6</sub> Br <sub>8</sub> ](py) <sub>2</sub> Cl <sub>4</sub> ]                                            |                | 17.761(8)    | 20.594(10)   | 12.536(6)    |            |
| [[Mo <sub>6</sub> Br <sub>8</sub> ](py) <sub>2</sub> Br <sub>4</sub> ]                                            |                | 18.143(4)    | 21.102(6)    | 12.686(3)    |            |

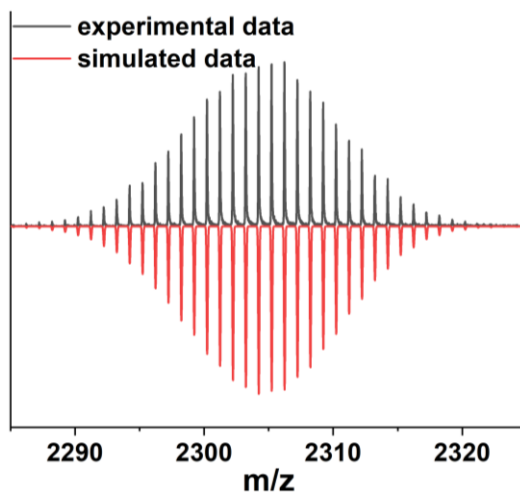

**Figure S2.** Fragment of ESI-MS of mother liquor illustrating the presence of [[Mo<sub>6</sub>I<sub>8</sub>](py)<sub>2</sub>I<sub>5</sub>]<sup>-</sup>.

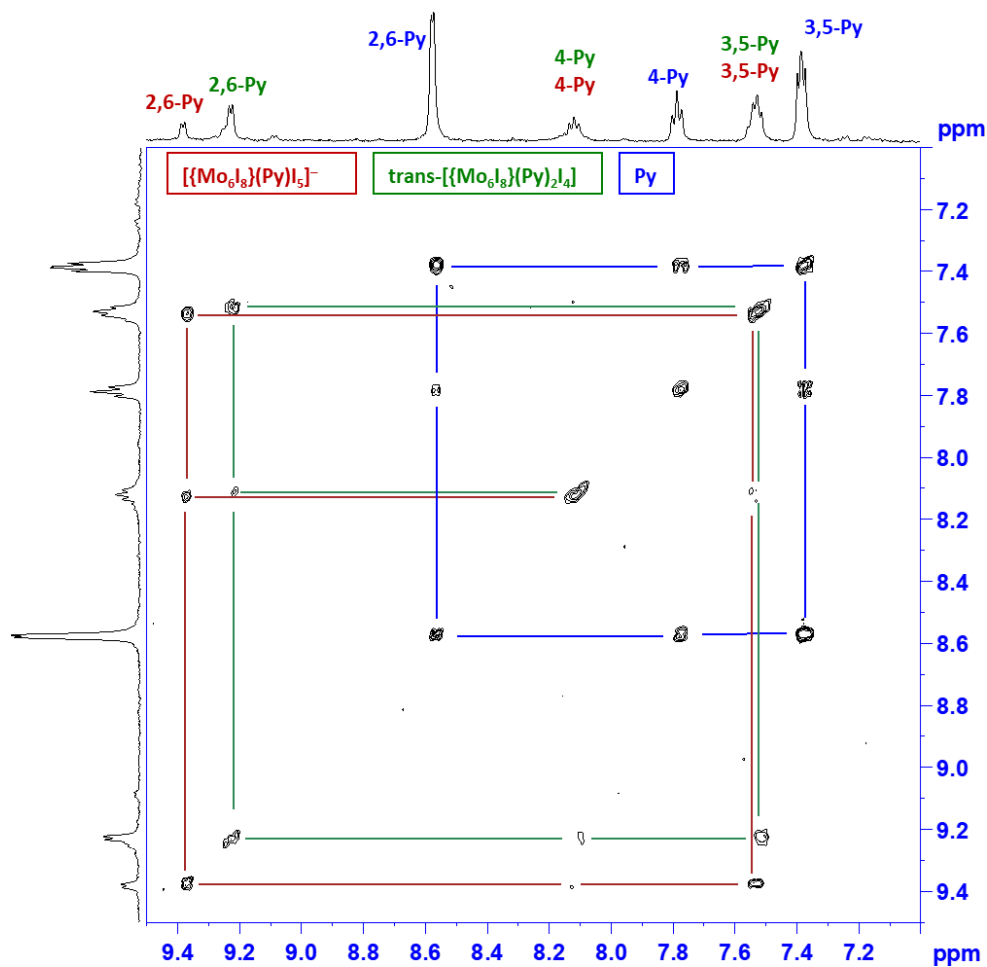

**Figure S3.** <sup>1</sup>H-COSY NMR spectrum of (pyH)<sub>0.2</sub>[[Mo<sub>6</sub>I<sub>8</sub>](py)<sub>1.8</sub>I<sub>4.2</sub>]<sub>2</sub>·1.8py.

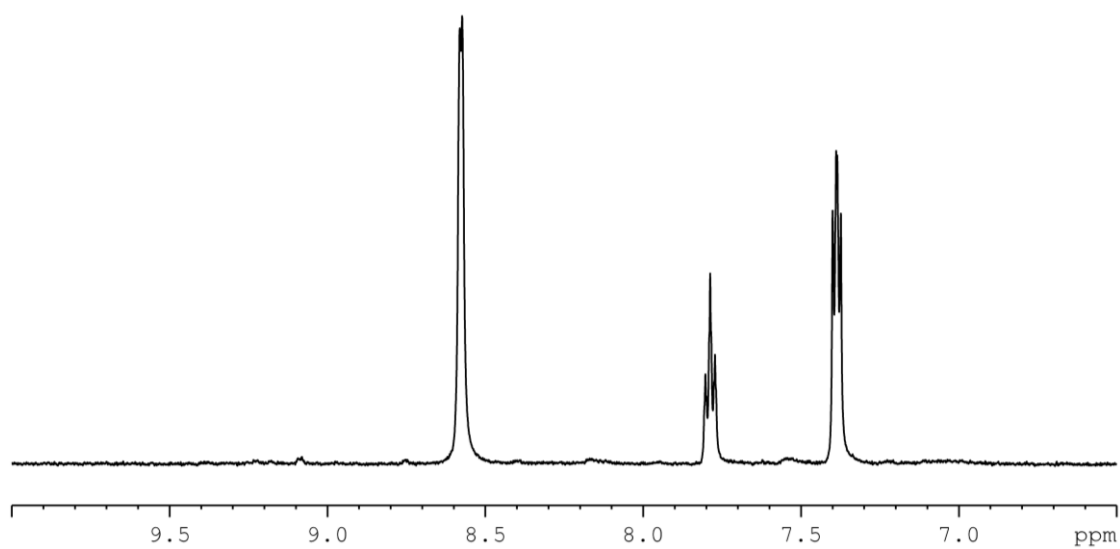

**Figure S4.**  $^1\text{H}$ -NMR spectrum of  $(\text{pyH})_{0.2}[\{\text{Mo}_6\text{I}_8\}(\text{py})_{1.8}\text{I}_{4.2}]\cdot 1.8\text{py}$  after heating in  $\text{DMSO-d}_6$ .

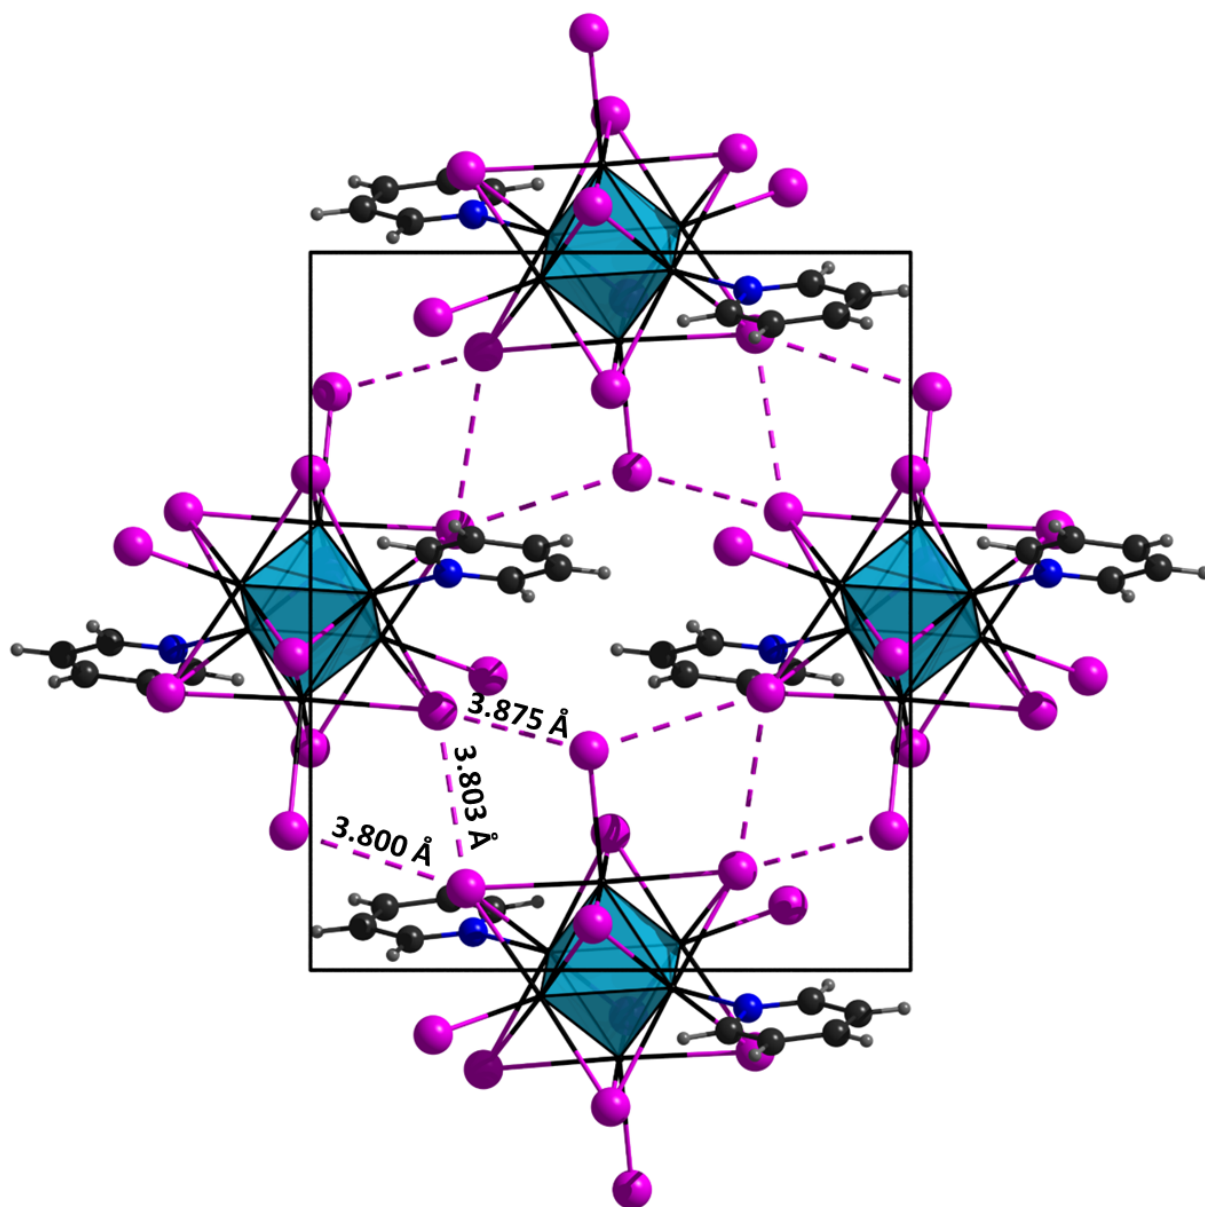

**Figure S5.** I $\cdots$ I $^a$  and I $\cdots$ I interactions in  $(\text{pyH})_{0.2}[\{\text{Mo}_6\text{I}_8\}(\text{py})_{1.8}\text{I}_{4.2}]\cdot 1.8\text{py}$ .

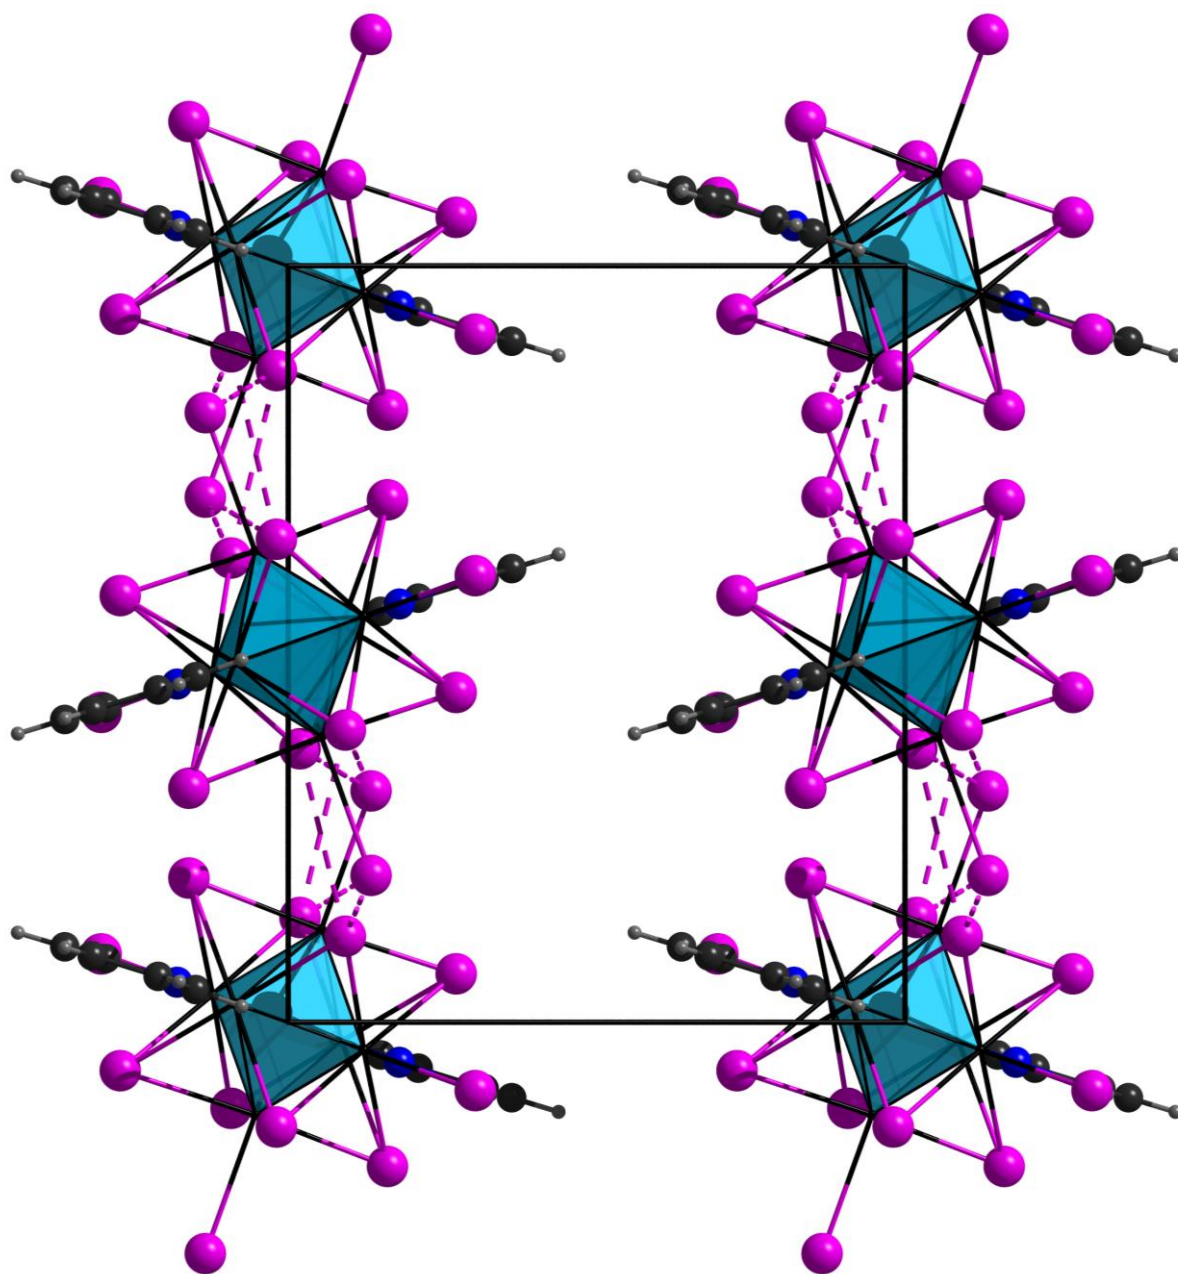

**Figure S6.** Layers in  $(\text{pyH})_{0.2}[\text{Mo}_6\text{I}_8(\text{py})_{1.8}\text{I}_{4.2}] \cdot 1.8\text{py}$ .
